# Supplementary material
Source: PubMed Central journal article supplement (PMC7685094)
Supplement: NIHMS1639529-supplement-Supp__Materials.pdf [file NIHMS1639529-supplement-Supp__Materials.pdf]

## Supplementary Information

### Supplementary Methods and Materials

#### Bone marrow samples of the patient and a normal donor

The patient's BM sample was obtained after written informed consent was obtained. This study was approved by the Institutional Review Board of University of Minnesota in accordance with Declaration of Helsinki. A normal donor's BM sample was purchased (Lonza, Basel, Switzerland). All reported studies were conducted using fresh BM samples.

#### Next Generation Sequencing (NGS)

NGS analysis was performed using a CLIA-validated 70-gene assay custom designed for hematologic malignancies as described previously (**Supplementary Table S1**).<sup>16</sup> Variant allele fraction (VAF) refers to the proportion of mutant/variant alleles relative the proportion of reference (wildtype) alleles in the DNA sequencing data.

To assess the gene variants for clinical significance, we used the Genome Aggregation Database (gnomAD, <https://gnomad.broadinstitute.org/>). The *ASXL1 Glu222Asp* variant is absent from normal human variation databases, it has not been characterized in the literature; it does not occur in a well-characterized functional domain; the three main in silico algorithms used by our laboratory (SIFT, Provean, Polyphen 2) provide conflicting predictions of pathogenic vs. benign impact. Based on these features, we have clinically interpreted the variant as uncertain. Missense variation is less common (vs. frameshift or nonsense loss of functions) in hematologic neoplasms. Thus, we believe the *ASXL1* variant is unlikely to significantly impact disease pathogenesis.

### Flow cytometry-based cell sorting

A total of 100 million cells of the patient's BM sample were stained with fixable viability dye E fluor 450 (e-Bioscience), blocked with Fc block (BD pharmingen, San Diego, CA), and stained with surface markers (BD biosciences, San Jose, CA) (**Supplementary Table S2**). Cells were sorted into CD34+ progenitors, myeloid, and lymphoid fractions using BD FACS Aria II (BD Biosciences, San Jose, CA) (**Supplementary Figure S1**).

### Colony-formation assay (CFA)

12,500 patient BM cells were plated in semi-solid methylcellulose-based media (MethoCult H4435, StemCell Technologies, Vancouver, Canada) in the presence of midostaurin (400nM), ruxolitinib (400nM), or DMSO vehicle. Colony numbers were scored after a 7-day culture. Colonies are defined as a cluster of at least 10 cells.

### Intracellular signaling assay by mass cytometry

BM samples were incubated for 30 minutes at 37°C in a medium of RPMI 1640 (Gibco, Billings, MT) with 10% fetal bovine serum and 1% penicillin/streptomycin, termed RPMI-10. Cells were washed in phosphate buffered saline (PBS), treated with cisplatin (Fluidigm, San Francisco, CA), blocked with Human Fc block (BD Pharmingen, San Diego, CA), and stained for surface markers. Stained cells were fixed in 1.6% paraformaldehyde (Electron Microscopy Sciences, Hatfield, PA), permeabilized in methanol, and stored at -80°C. Intracellular staining was done followed by intercalation and analyzed with a CyTOF mass cytometer (DVS Sciences, Ontario, Canada). All antibodies for mass cytometry were from Fluidigm (**Supplementary Table S3**).

### Proliferation Assay by flow cytometry

The patient's fresh BM cells were labeled with CellTrace Violet Cell Proliferation Dye (Invitrogen). Cells were washed and then treated with DMSO, thrombopoietin (TPO) 10ng/ml, stem cell factor (SCF) 10ng/ml, ruxolitinib 400nM, midostaurin 400nM in the media (RPMI with 10% fetal bovine serum). Approximately 1.5 million cells per 1ml per condition were incubated in a 24-well plate with flat bottom for 7 days at 37°C and harvested. Cells were stained with Fixable Near-IR Dead Cell Dye (Invitrogen, Carlsbad, CA), then with fluorochrome-conjugated antibodies (**Supplementary Table S2**).

### **Supplementary Tables**

Supplementary Table S1: Mutation analysis in CD34+ and myeloid cells

Supplementary Table S2: Antibodies for flow cytometry

Supplementary Table S3: Antibodies for mass cytometry

### **Supplementary Figure. Overall Study Scheme and gating of the primary bone marrow**

**sample. A.** Overall study scheme. The bone marrow sample was obtained one year after midostaurin therapy. SM-AHN bone marrow material mononuclear cells were sorted for cell-lineage-specific mutational analysis, and plated in proliferation assays and colony forming assays, and processed for intracellular signaling assays. **B.** Gating scheme for flow cytometry analysis.

A

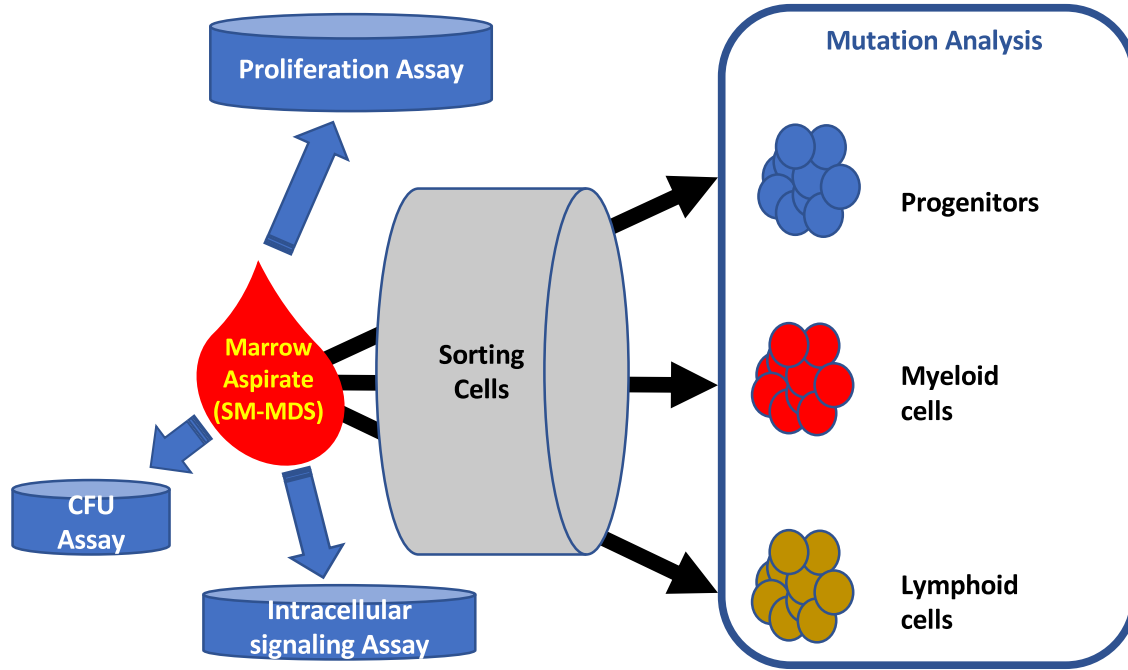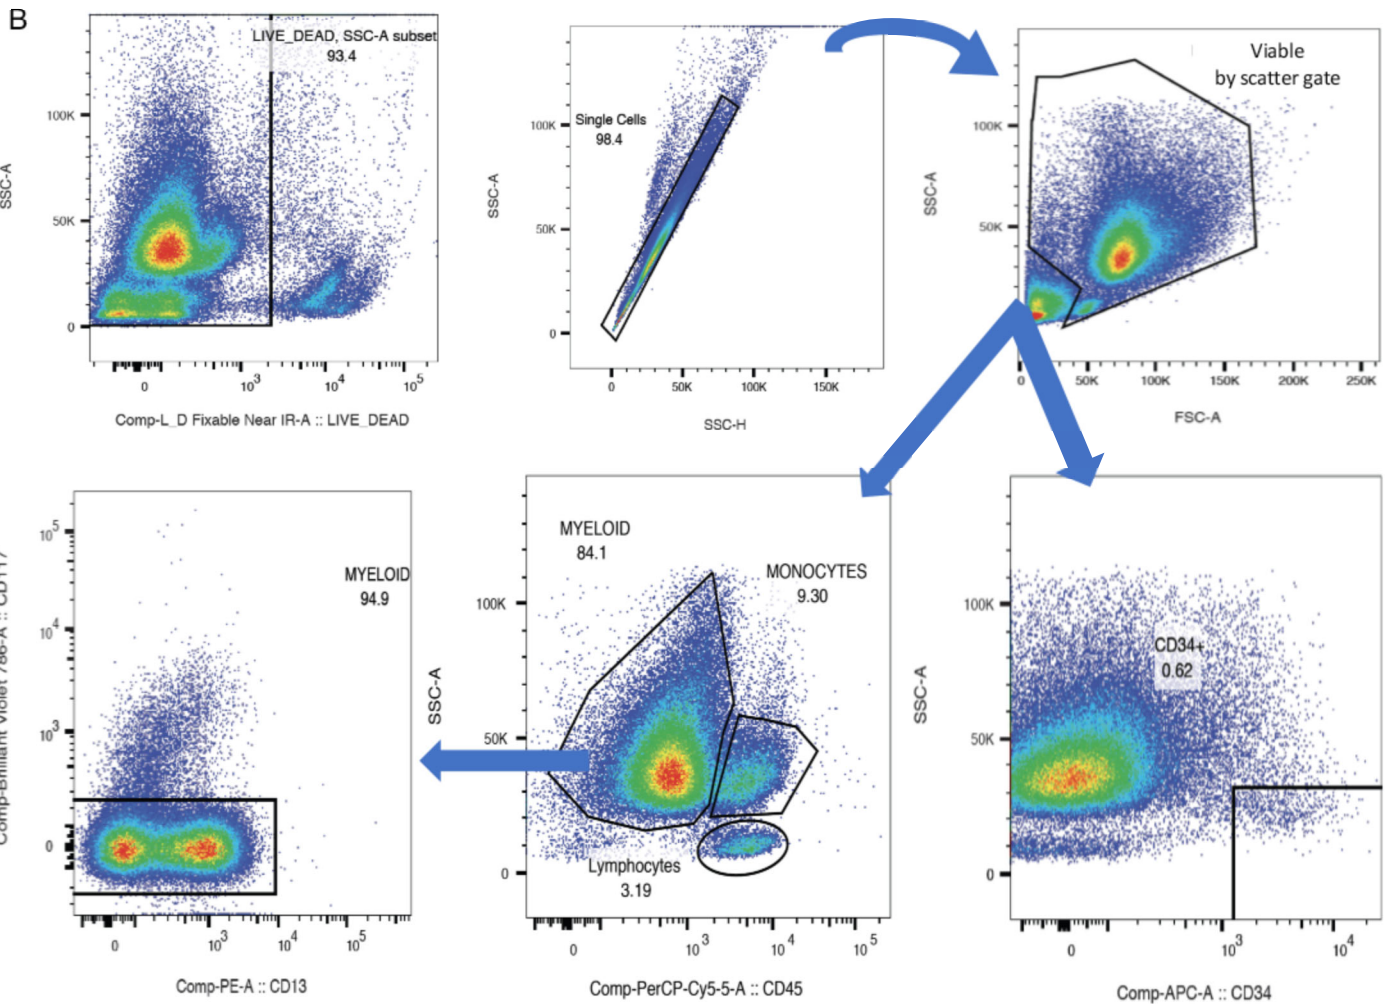

**Mutation analysis**

| <b>Genes</b>  | <b>Alteration</b> |
|---------------|-------------------|
| <i>ABL1</i>   | No                |
| <i>ALK</i>    | No                |
| <i>ASXL1</i>  | Yes               |
| <i>BCOR</i>   | No                |
| <i>CALR</i>   | No                |
| <i>CBL</i>    | Yes               |
| <i>CEBPA</i>  | No                |
| <i>CSF3R</i>  | No                |
| <i>DNMT3A</i> | No                |
| <i>ETV6</i>   | No                |
| <i>EZH2</i>   | No                |
| <i>FLT3</i>   | No                |
| <i>GATA1</i>  | No                |
| <i>GATA2</i>  | No                |
| <i>HRAS</i>   | No                |
| <i>IDH1</i>   | No                |
| <i>IDH2</i>   | No                |
| <i>JAK1</i>   | No                |
| <i>JAK2</i>   | No                |
| <i>JAK3</i>   | No                |
| <i>KIT</i>    | Yes               |
| <i>KRAS</i>   | No                |
| <i>KMT2A</i>  | No                |
| <i>MPL</i>    | No                |
| <i>NF1</i>    | No                |
| <i>NPM1</i>   | No                |
| <i>NRAS</i>   | No                |
| <i>PDGFRA</i> | No                |
| <i>PDGFRB</i> | No                |
| <i>PHF6</i>   | No                |
| <i>PTPN11</i> | No                |
| <i>RARA</i>   | No                |
| <i>RUNX1</i>  | No                |
| <i>SETBP1</i> | No                |
| <i>SF1</i>    | No                |
| <i>SF3A1</i>  | No                |
| <i>SF3B1</i>  | No                |
| <i>SH2B3</i>  | No                |
| <i>SRSF2</i>  | No                |
| <i>TET2</i>   | Yes               |
| <i>TP53</i>   | No                |
| <i>U2AF2</i>  | No                |
| <i>WT1</i>    | No                |
| <i>ZRSR2</i>  | No                |

**Antibodies for flow cytometry**

| <b>Antibody</b> | <b>Conjugated Fluorophore</b> |
|-----------------|-------------------------------|
| Anti CD117      | BV786                         |
| Anti CD25       | PE-Cy7                        |
| Anti CD45       | Per-Cp-Cy-5.5                 |
| Anti CD34       | APC                           |
| Anti CD13       | PE                            |
| Anti CD38       | FITC                          |
| Anti CD3        | PE-CF594                      |

**Antibodies for mass cytometry**

| <b>Antibody</b>         | <b>Conjugated Isotope</b> |
|-------------------------|---------------------------|
| CD45                    | 89Y                       |
| CD117(c-Kit)            | 143Nd                     |
| CD38                    | 144Nd                     |
| CD2                     | 151Eu                     |
| CD13                    | 160Gd                     |
| CD34                    | 163Dy                     |
| CD25 (IL-2R)            | 169Tm                     |
| pSHP2(Y580)             | 141Pr                     |
| Caspase 3<br>(cleaved)  | 142Nd                     |
| P STAT5                 | 147Sm                     |
| P4E-BP1                 | 149Sm                     |
| pAKT(S473)              | 152Sm                     |
| P STAT1(Y701)           | 153Sm                     |
| p-p38(T180/Y182)        | 156Gd                     |
| Cyclin A                | 158Gd                     |
| pMAPAPK II              | 159Tb                     |
| CyclinB1                | 164Dy                     |
| $\beta$ -Catenin        | 165Ho                     |
| pNF-kB p65 [S529]       | 166Er                     |
| Ki-67                   | 168Er                     |
| pERK 1/2<br>[T202/Y204] | 171Yb                     |
| pSTAT4 [Y693]           | 174Yb                     |
| pHistone H3 [S28]       | 175Lu                     |
| c-Myc                   | 176Yb                     |
